# Supplementary material for: Inferring bacterial transmission dynamics using deep sequencing genomic surveillance data
Source: PubMed Central journal article supplement (PMC10618251; doi:10.1038/s41467-023-42211-8), 2023-10-31
Supplement: 41467_2023_42211_MOESM3_ESM.pdf [file 41467_2023_42211_MOESM3_ESM.pdf]

# Inferring bacterial transmission dynamics using deep sequencing genomic surveillance data

Madikay Senghore <sup>1\*</sup>, Hannah Read <sup>2</sup>, Priyali Oza <sup>2</sup>, Sarah Johnson <sup>2</sup>, Hemanoel Passarelli-Araujo <sup>1,3</sup>, Bradford P Taylor <sup>1</sup>, Stephen Ashley <sup>2</sup>, Alex Grey <sup>2</sup>, Alanna Callendrello <sup>1</sup>, Robyn Lee <sup>1,4</sup>, Matthew R Goddard <sup>5,6</sup>, Thomas Lumley <sup>7</sup>, William P Hanage<sup>1</sup>, Siouxsie Wiles <sup>2,8\*</sup>

## Author affiliations:

<sup>1</sup>Center for Communicable Disease Dynamics, Department of Epidemiology, Harvard TH Chan School of Public Health, Boston, Massachusetts, USA

<sup>2</sup>Bioluminescent Superbugs Lab, Department of Molecular Medicine and Pathology, University of Auckland, Auckland, New Zealand

<sup>3</sup>Department of Biochemistry and Immunology, Federal University of Minas Gerais, Minas Gerais, Brazil

<sup>4</sup>University of Toronto Dalla Lana School of Public Health: Toronto, Ontario, Canada

<sup>5</sup>School of Biological Sciences, University of Auckland, Auckland, New Zealand

<sup>6</sup>School of Life and Environmental Sciences, University of Lincoln, UK

<sup>7</sup>Department of Statistics, University of Auckland, Auckland, New Zealand

<sup>8</sup>Te Pūnaha Matatini, Centre of Research Excellence in Complex Systems, New Zealand

These authors contributed equally: Madikay Senghore, Hannah Read.

These authors jointly supervised this work: William P Hanage, Siouxsie Wiles.

\*Corresponding authors:

Madikay Senghore: msenghore@hsph.harvard.edu

Siouxsie Wiles: s.wiles@auckland.ac.nz

## File name: Supplementary Data 1.

**Description:** This file is comprised of data for each individual animal. Data provided for the route of transmission (oral-gavage or natural transmission); median weight (g); range in weight over the 14-day infection (g); weight change between the start and end of the infection (%); weight change between the start and day 7 of infection (%); bacterial counts prior to co-mingling (colony forming units per gram of stool); calculated area under curve values for bacterial shedding (colony forming units per g stool over the course of the 14-day infection).

## File name: Supplementary Data 2.

**Description:** This file is comprised of data for each single nucleotide variant (SNV). Data provided for position in the genome; base in the reference genome; base in the query sequence; SNV category (downstream gene variant, upstream gene variant, missense variant, stop gained, synonymous variant, non-coding transcript exon variant, splice region variant & non-coding transcript exon variant); effect (low, moderate, high, modifier); gene; locus; accession number; gene type (protein coding, sRNA, pseudogene).
